# Supplementary material
Source: Springer Nature journal article supplement (https://www.springermedizin.de/resource/supplementary/12879_2010_1268_MOESM1_ESM.pdf/9442222)

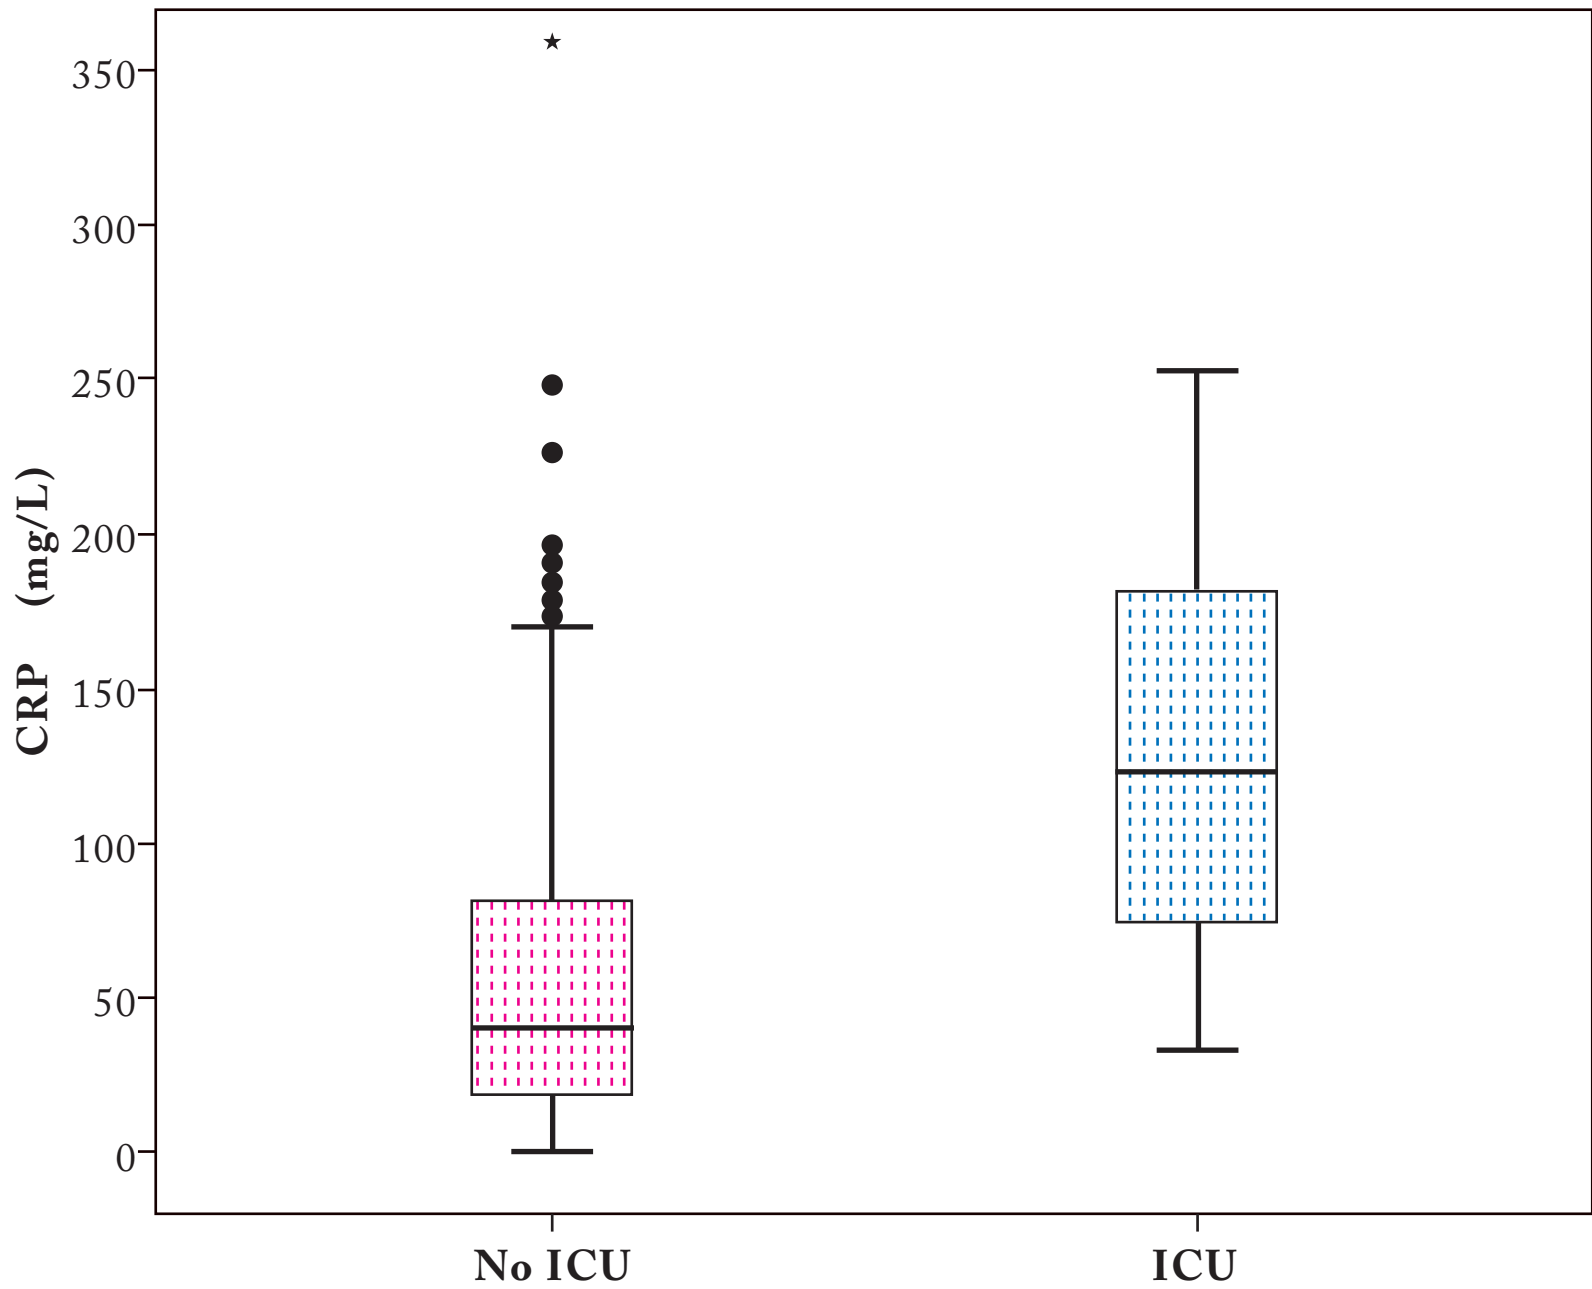

Supplement: MOESM1 [file 9442222]
